# Supplementary material for: Costing the impact of interventions during pregnancy in the UK: a systematic review of economic evaluations
Source: HighWire-hosted journal article supplement (doi:10.1136/bmjopen-2020-040022), 2020-10-01
Supplement: bmjopen-2020-040022supp005_data_supplement.pdf [file bmjopen-2020-040022supp005_data_supplement.pdf]

Supplementary material 5 - Extracted costs for antenatal care

| Activity<br><br>costed                                        | Economic evaluations<br><br>for National guidelines | Review articles                                                                                                                                                                | Primary research studies                                                                                                                           |                  |                  |                                       |
|---------------------------------------------------------------|-----------------------------------------------------|--------------------------------------------------------------------------------------------------------------------------------------------------------------------------------|----------------------------------------------------------------------------------------------------------------------------------------------------|------------------|------------------|---------------------------------------|
|                                                               |                                                     |                                                                                                                                                                                | Unit costs reported                                                                                                                                | Range            | Mean (SD)        | Comments                              |
| Estimated cost for standard midwife antenatal appointment     | Not costed                                          | £27.34 / 20 minute appointment [1],<br><br>£224.99 / pregnancy for community care [2],<br><br>£264.56 / pregnancy for midwife-led hospital care [2],<br><br>£131.94 / hour [3] | £76.03 / appointment [4],<br><br>£146.25 / appointment [5],<br><br>£60.49 / appointment [6]                                                        | £27.34 - £146.25 | £70.82 (£45.92)  | Only 'per appointment' estimates used |
| Estimated cost for a standard obstetric antenatal appointment | Not costed                                          | £114.14 / follow-up appointment [1],<br><br>£515.55 / pregnancy[2]                                                                                                             | £43.36 [7],<br><br>£166.68 / appointment [4],<br><br>£312.29 / appointment [8],<br><br>£153.94 / appointment [5],<br><br>£124.12 / appointment [6] | £43.36 - £312.29 | £152.42 (£89.36) | Only 'per appointment' estimates used |

| Activity<br>costed                                                        | Economic evaluations<br>for National guidelines | Review articles | Primary research studies                                                                                            |                  |                      |                                          |
|---------------------------------------------------------------------------|-------------------------------------------------|-----------------|---------------------------------------------------------------------------------------------------------------------|------------------|----------------------|------------------------------------------|
|                                                                           |                                                 |                 | Unit costs reported                                                                                                 | Range            | Mean (SD)            | Comments                                 |
| Estimated<br>cost for any<br>antenatal<br>appointment                     | £95.75 / appointment<br>[9]                     | Not costed      | £115.62 / appointment [10],<br>£103.28 / appointment [11]                                                           | £95.75 - £115.62 | £104.88<br>(£10.03)  | Only 'per appointment' estimates<br>used |
| Estimated<br>cost for a<br>glucose<br>tolerance test                      | £23.73[9]                                       | £24.26 [3]      | £26.16 [12],<br>£13.03 [11]                                                                                         | £13.03 - £26.16  | £21.80 (£5.94)       |                                          |
| Estimated<br>cost for<br>attendance<br>to maternity<br>day<br>unit/triage | Not costed                                      | Not costed      | £150.37 / visit [13],<br>£415.65 / visit [8],<br>£6.56 for nurse-led or £15.49 for<br>doctor-led triage review [14] | £6.56 - £415.65  | £147.02<br>(£190.79) |                                          |

| Activity<br>costed                                              | Economic evaluations<br>for National guidelines | Review articles | Primary research studies                                                                                                                                                                                                                                                                                                                                                                                                                                                    |                        |                      |                               |
|-----------------------------------------------------------------|-------------------------------------------------|-----------------|-----------------------------------------------------------------------------------------------------------------------------------------------------------------------------------------------------------------------------------------------------------------------------------------------------------------------------------------------------------------------------------------------------------------------------------------------------------------------------|------------------------|----------------------|-------------------------------|
|                                                                 |                                                 |                 | Unit costs reported                                                                                                                                                                                                                                                                                                                                                                                                                                                         | Range                  | Mean (SD)            | Comments                      |
| Estimated<br>cost for an<br>antenatal<br>inpatient<br>admission | Not costed                                      | Not costed      | £330.84 on antenatal ward or<br>£1115.87 on labour ward [15],<br>£366.00 / day [16],<br>£1403.55 / admission [17],<br>£298.47 / day [13],<br>£758.18 / day for first three days<br>and £448.01 / day after this [10],<br>£466.91 / day [18],<br>£457.75 / day [4],<br>£867.59/day for first five days and<br>£414.55 / day after this [8],<br>£414.55 / day [5],<br>£447.12 / day [19],<br>£1658.89 for standard antenatal<br>stay, £304.45 for additional bed<br>days [14] | £298.47 -<br>£1,115.87 | £524.11<br>(£239.07) | Only 'per day' estimates used |

| Activity<br>costed                                                  | Economic evaluations<br>for National guidelines | Review articles                                                                                                                     | Primary research studies                                                                                         |                  |                  |                                |
|---------------------------------------------------------------------|-------------------------------------------------|-------------------------------------------------------------------------------------------------------------------------------------|------------------------------------------------------------------------------------------------------------------|------------------|------------------|--------------------------------|
|                                                                     |                                                 |                                                                                                                                     | Unit costs reported                                                                                              | Range            | Mean (SD)        | Comments                       |
| Estimated<br>cost for an<br>ultrasound<br>scan<br>(sonographer<br>) | £139.85 [9]                                     | £74.90 / first scan and<br>£61.83 / subsequent scans<br>[1],<br>£56.07 / scan [20],<br>£42.24 / scan [21],<br>£142.95 / 3 scans [3] | £57.66 / scan [22],<br>£121.87 / scan [4],<br>£120.49 / scan [11],<br>£120.72 / scan [6],<br>£112.21 / scan [23] | £42.24 - £139.85 | £86.86 (£36.13)  | Only 'per scan' estimates used |
| Estimated<br>cost for an<br>ultrasound<br>scan<br>(specialist)      | Not costed                                      | Not costed                                                                                                                          | £77.82/ scan [18],<br>£127.55 / scan [8],<br>£143.65 / scan [6]                                                  | £77.82 - £143.65 | £116.34 (£34.32) | Only 'per scan' estimates used |

## References

1. Mistry, H., et al., *A structured review and exploration of the healthcare costs associated with stillbirth and a subsequent pregnancy in England and Wales*. BMC Pregnancy Childbirth, 2013. **13**: p. 236.
2. Thomas, C.M. and S. Cameron, *Can we reduce costs and prevent more unintended pregnancies? A cost of illness and cost-effectiveness study comparing two methods of EHC*. BMJ Open, 2013. **3**(12): p. e003815.
3. Farrar, D., et al., *The identification and treatment of women with hyperglycaemia in pregnancy: an analysis of individual participant data, systematic reviews, meta-analyses and an economic evaluation*. Health Technol Assess, 2016. **20**(86): p. 1-348.
4. Campbell, H.E., et al., *Healthcare and wider societal implications of stillbirth: a population-based cost-of-illness study*. BJOG, 2018. **125**(2): p. 108-117.

5. Vathish, M., et al., *sFlt-1/PlGF ratio test for pre-eclampsia: an economic assessment for the UK*. Ultrasound Obstet Gynecol, 2016. **48**(6): p. 765-771.
6. Jones, M., et al., *A dynamic, modifiable model for estimating cost-effectiveness of smoking cessation interventions in pregnancy: application to an RCT of self-help delivered by text message*. Addiction, 2019. **114**(2): p. 353-365.
7. Walker, K.F., et al., *Labour induction near term for women aged 35 or over: an economic evaluation*. BJOG, 2017. **124**(6): p. 929-934.
8. Duckworth, S., et al., *Placental Growth Factor (PlGF) in Women with Suspected Pre-Eclampsia Prior to 35 Weeks' Gestation: A Budget Impact Analysis*. PLoS One, 2016. **11**(10): p. e0164276.
9. National Institute for Health and Care Excellence, *Diabetes in pregnancy: management from preconception to the postnatal period*. 2015.
10. Lain, S.J., et al., *An economic evaluation of planned immediate versus delayed birth for preterm prelabour rupture of membranes: findings from the PPRoMT randomised controlled trial*. BJOG, 2017. **124**(4): p. 623-630.
11. Jacklin, P.B., et al., *A cost-effectiveness comparison of the NICE 2015 and WHO 2013 diagnostic criteria for women with gestational diabetes with and without risk factors*. BMJ Open, 2017. **7**(8): p. e016621.
12. Round, J.A., et al., *Screening for gestational diabetes mellitus: cost-utility of different screening strategies based on a woman's individual risk of disease*. Diabetologia, 2011. **54**(2): p. 256-63.
13. Coomarasamy, A., et al., *PROMISE: first-trimester progesterone therapy in women with a history of unexplained recurrent miscarriages - a randomised, double-blind, placebo-controlled, international multicentre trial and economic evaluation*. Health Technol Assess, 2016. **20**(41): p. 1-92.
14. Xydopoulos, G., et al., *Home blood-pressure monitoring in a hypertensive pregnant population: cost-minimization study*. Ultrasound Obstet Gynecol, 2019. **53**(4): p. 496-502.
15. Petrou, S., et al., *Cost-effectiveness analysis of prostaglandin E2 gel for the induction of labour at term*. BJOG, 2011. **118**(6): p. 726-34.
16. Eddama, O., et al., *Study of progesterone for the prevention of preterm birth in twins (STOPPIT): findings from a trial-based cost-effectiveness analysis*. Int J Technol Assess Health Care, 2010. **26**(2): p. 141-8.
17. Essex, H.N., et al., *Cost-Effectiveness of Nicotine Patches for Smoking Cessation in Pregnancy: A Placebo Randomized Controlled Trial (SNAP)*. Nicotine Tob Res, 2015. **17**(6): p. 636-42.
18. Parisaei, M., et al., *Implementation of foetal fibronectin testing: Admissions, maternal interventions and costs at 1 year*. J Obstet Gynaecol, 2016. **36**(7): p. 888-892.
19. Waugh, J., et al., *Spot protein-creatinine ratio and spot albumin-creatinine ratio in the assessment of pre-eclampsia: a diagnostic accuracy study with decision-analytic model-based economic evaluation and acceptability analysis*. Health Technol Assess, 2017. **21**(61): p. 1-90.
20. Deshpande, S.N., et al., *Rapid fetal fibronectin testing to predict preterm birth in women with symptoms of premature labour: a systematic review and cost analysis*. Health Technol Assess, 2013. **17**(40): p. 1-138.
21. O'Donnell, A., et al., *Treatments for hyperemesis gravidarum and nausea and vomiting in pregnancy: a systematic review and economic assessment*. Health Technol Assess, 2016. **20**(74): p. 1-268.
22. Carolan-Rees, G. and A.F. Ray, *The ScanTrainer obstetrics and gynaecology ultrasound virtual reality training simulator: A cost model to determine the cost viability of replacing clinical training with simulation training*. Ultrasound, 2015. **23**(2): p. 110-5.

23. Wastlund, D., et al., *The cost-effectiveness of universal late-pregnancy screening for macrosomia in nulliparous women: a decision-analysis*. BJOG, 2019.
