# Supplementary material for: Costing the impact of interventions during pregnancy in the UK: a systematic review of economic evaluations
Source: HighWire-hosted journal article supplement (doi:10.1136/bmjopen-2020-040022), 2020-10-01
Supplement: bmjopen-2020-040022supp006_data_supplement.pdf [file bmjopen-2020-040022supp006_data_supplement.pdf]

Supplementary material 6 - Extracted costs for intrapartum care

| Activity<br><br>costed | Economic Evaluations<br><br>for National Guidelines | Review articles                                                                                                                 | Primary research studies                                                                                                                                                                                                                                                 |                   |                                                                                         |
|------------------------|-----------------------------------------------------|---------------------------------------------------------------------------------------------------------------------------------|--------------------------------------------------------------------------------------------------------------------------------------------------------------------------------------------------------------------------------------------------------------------------|-------------------|-----------------------------------------------------------------------------------------|
|                        |                                                     |                                                                                                                                 | Unit costs reported                                                                                                                                                                                                                                                      | Range             | Mean (SD)                                                                               |
| Induction of labour    | £31.17 for drugs only [1]                           | £33.35 for Propess, £39.53 for vaginal prostaglandin gel/tablet. Inpatient days costed separately[2], £361.77 for induction [3] | £47.56 [4],<br>£518.46-£805.42 in addition to cost of vaginal birth [5],<br>£791.53 in addition to the cost of a vaginal birth [6],<br>£33.35 for Propess pessary, £30.02 for 2 doses of Prostin [7],<br>£28.94 for 2 doses of 3mg dinoprostone tablet [8]<br>£290.60[9] | £31.17 - £805.42  | £469.22 (£323.86)<br><br>Only fully-costed induction included in the summary estimates. |
| Augmentation of labour | £34.98 [1],<br>£56.96 [10]                          | £1.90 for oxytocin, £2.97 for amniotomy and oxytocin[2]                                                                         | £189.16[11],<br>£1.01 for oxytocin, £0.95 for Amnihook [7],<br>£1.10 for oxytocin [12]                                                                                                                                                                                   | £1.10 - £189.16   | £41.29 (£68.72)                                                                         |
| Epidural               | £118.08 [10]                                        | Not costed                                                                                                                      | £369.89 [11],<br>£693.70 in addition to the cost of a vaginal birth [6],<br>£345.73 [7]                                                                                                                                                                                  | £118.08 - £693.70 | £381.85 (£266.89)                                                                       |

| Activity<br>costed        | Economic Evaluations<br>for National Guidelines | Review articles                                                                                                 | Primary research studies                                                                                                                                                                                                                                                                                                                                                            |                              |                     |
|---------------------------|-------------------------------------------------|-----------------------------------------------------------------------------------------------------------------|-------------------------------------------------------------------------------------------------------------------------------------------------------------------------------------------------------------------------------------------------------------------------------------------------------------------------------------------------------------------------------------|------------------------------|---------------------|
|                           |                                                 |                                                                                                                 | Unit costs reported                                                                                                                                                                                                                                                                                                                                                                 | Range                        | Mean (SD)           |
| Spontaneous vaginal birth | £1,170.50 [1],<br><br>£1,762.19 [10]            | £1,888.08 [13],<br><br>£1,222.87 if within 24 hours of commencing induction of labour[2],<br><br>£1,905.40 [14] | £1,125.95 for birth without complication or £2,474.24 for birth with complication [11],<br><br>£1,729.09 [15],<br><br>£1,460.77-£1,812.38, dependent upon complexity [5],<br><br>£1,782.05 [6],<br><br>£1,473.00 [7],<br><br>£2,572.02 [16],<br><br>£1,943.23 [17],<br><br>£1,607.61 [12],<br><br>£1,648.92 [8],<br><br>£2,721.27 [18],<br><br>£2,586.11 [9],<br><br>£2,343.25 [19] | £1,125.95 -<br><br>£2,721.27 | £1,854.15 (£486.97) |

| Activity<br>costed        | Economic Evaluations<br>for National Guidelines | Review articles                                                              | Primary research studies                                                                                                                                                                                                                                                                                                                                    |                              |                                                                            |
|---------------------------|-------------------------------------------------|------------------------------------------------------------------------------|-------------------------------------------------------------------------------------------------------------------------------------------------------------------------------------------------------------------------------------------------------------------------------------------------------------------------------------------------------------|------------------------------|----------------------------------------------------------------------------|
|                           |                                                 |                                                                              | Unit costs reported                                                                                                                                                                                                                                                                                                                                         | Range                        | Mean (SD)                                                                  |
| Instrumental<br><br>birth | £1,662.25 [1] ,<br><br>£2,663.45 [10]           | £1,633.64 [13],<br><br>£1194.17 more than a spontaneous<br>vaginal birth [3] | £52.64 - in addition to cost of labour [20],<br><br>£510.31 - 677.59 for birth plus staffing and overhead costs for<br>labour [11],<br><br>£2,961.67 [15],<br><br>£1,922.20 - £2,524.68 (dependent on complexity) [5],<br><br>£3,100.37 [6],<br><br>£2,003.28 [7],<br><br>£3,100.37 [16],<br><br>£2,866.18 [17],<br><br>£2,045.26 [12],<br><br>£2,056.62[8] | £1,633.64 -<br><br>£3,866.18 | £2,378.33 (£552.20)<br><br>Only estimates of labour<br>and birth included. |

| Activity<br>costed               | Economic Evaluations<br>for National Guidelines | Review articles                                                                            | Primary research studies                                                                                                                                                                                                                                                   |                          |                                                                                            |
|----------------------------------|-------------------------------------------------|--------------------------------------------------------------------------------------------|----------------------------------------------------------------------------------------------------------------------------------------------------------------------------------------------------------------------------------------------------------------------------|--------------------------|--------------------------------------------------------------------------------------------|
|                                  |                                                 |                                                                                            | Unit costs reported                                                                                                                                                                                                                                                        | Range                    | Mean (SD)                                                                                  |
| Elective<br>Caesarean<br>section | £2,724.24 - £3,494.18<br>[1],<br>£3,923.25 [10] | £2,166.30 [13],<br>£972.05 more than a spontaneous<br>vaginal birth [3],<br>£3,966.92 [14] | £1,251.51 plus staffing and overhead costs [11],<br>£4,281.45 [15],<br>£2,935.27 - £3,438.43(depends on complexity) [5],<br>£3,380.67 [6],<br>£2,983.79 [7],<br>£3,402.19 [17],<br>£3,385.25 [8],<br>£4,120.81 [18],<br>£1,056.44 [21],<br>£3710.33 [9],<br>£3,506.86 [19] | £1,056.44 -<br>£4,281.45 | £3,164.49 (£801.63)<br><br>Only full estimates of<br>elective Caesarean birth<br>included. |

| Activity<br>costed                | Economic Evaluations<br>for National Guidelines | Review articles                                                                           | Primary research studies                                                                                                                                                                                                                                                                                                                                                                                                                            |                          |                                                                           |
|-----------------------------------|-------------------------------------------------|-------------------------------------------------------------------------------------------|-----------------------------------------------------------------------------------------------------------------------------------------------------------------------------------------------------------------------------------------------------------------------------------------------------------------------------------------------------------------------------------------------------------------------------------------------------|--------------------------|---------------------------------------------------------------------------|
|                                   |                                                 |                                                                                           | Unit costs reported                                                                                                                                                                                                                                                                                                                                                                                                                                 | Range                    | Mean (SD)                                                                 |
| Emergency<br>Caesarean<br>section | £2,724.24 - £3,494.18<br>[1],<br>£3,923.25 [10] | £3,541.94 [13],<br>£4,143.29 [2],<br>£972.05 more than a spontaneous<br>vaginal birth [3] | £318.78 - in addition to cost of labour [20],<br>£1,251.51 for birth plus staffing and overhead costs for labour [11],<br>£1,432.71 (in addition to cost of vaginal birth) [4],<br>£3,600.98 [15],<br>£3,717.67 - £4,284.10 (dependent on complexity) [5],<br>£4,212.22 [6],<br>£3,795.33 [7],<br>£4,278.73 [16],<br>£4,325.86 [17],<br>£4,039.93 [12],<br>£4,244.57 [8],<br>£4,555.92 [18],<br>£1,056.44 [21],<br>£4,982.21 [9],<br>£4,644.47 [19] | £2,724.24 -<br>£4,982.21 | £3864.74 (£867.58)<br><br>Only estimates of labour<br>and birth included. |
| Repair 3/4th<br>degree tear       | £351.95 [10]                                    |                                                                                           | £707.79 [11],<br>£70.37 [12]                                                                                                                                                                                                                                                                                                                                                                                                                        | £70.37 -<br>£707.79      | £376.70 (£321.71)                                                         |

| Activity<br>costed                                | Economic Evaluations<br>for National Guidelines                                           | Review articles | Primary research studies                                                               |                        |                   |
|---------------------------------------------------|-------------------------------------------------------------------------------------------|-----------------|----------------------------------------------------------------------------------------|------------------------|-------------------|
|                                                   |                                                                                           |                 | Unit costs reported                                                                    | Range                  | Mean (SD)         |
| Manual removal of placenta                        | £152.35 for staff and £236.49 for consumables [10]                                        | Not costed      | £819.58 [11],<br>£807.09 (in addition to the cost of vaginal birth [6],<br>£81.37 [12] | £81.37 - £819.58       | £524.22 (£387.80) |
| Postpartum haemorrhage (500-1500mL without shock) | £60.40 for staff and £40.32 for consumables [10]                                          | Not costed      | £169.34 [12]                                                                           | £100.72 - £169.34      | £135.03 (£85.18)  |
| Major obstetric haemorrhage (>1500mL)             | £950.28 for staff, £150.39 for one unit blood transfusion and £40.32 for consumables [10] | Not costed      | Not costed                                                                             | Only one cost provided |                   |

| Activity<br>costed                                                      | Economic Evaluations<br>for National Guidelines | Review articles | Primary research studies |                        |           |
|-------------------------------------------------------------------------|-------------------------------------------------|-----------------|--------------------------|------------------------|-----------|
|                                                                         |                                                 |                 | Unit costs reported      | Range                  | Mean (SD) |
| Examination<br>under<br>anaesthesia<br>for<br>postpartum<br>haemorrhage | Not costed                                      | £3,944.70 [14]  | Not costed               | Only one cost provided |           |

1. National Institute for Health and Care Excellence, *Hypertension in pregnancy: diagnosis and management*. 2011: p. 1-51.
2. Alfirevic, Z., et al., *Which method is best for the induction of labour? A systematic review, network meta-analysis and cost-effectiveness analysis*. Health Technol Assess, 2016. **20**(65): p. 1-584.
3. Farrar, D., et al., *The identification and treatment of women with hyperglycaemia in pregnancy: an analysis of individual participant data, systematic reviews, meta-analyses and an economic evaluation*. Health Technol Assess, 2016. **20**(86): p. 1-348.
4. Round, J.A., et al., *Screening for gestational diabetes mellitus: cost-utility of different screening strategies based on a woman's individual risk of disease*. Diabetologia, 2011. **54**(2): p. 256-63.
5. Coomarasamy, A., et al., *PROMISE: first-trimester progesterone therapy in women with a history of unexplained recurrent miscarriages - a randomised, double-blind, placebo-controlled, international multicentre trial and economic evaluation*. Health Technol Assess, 2016. **20**(41): p. 1-92.
6. Lain, S.J., et al., *An economic evaluation of planned immediate versus delayed birth for preterm prelabour rupture of membranes: findings from the PPRMT randomised controlled trial*. BJOG, 2017. **124**(4): p. 623-630.
7. Walker, K.F., et al., *Labour induction near term for women aged 35 or over: an economic evaluation*. BJOG, 2017. **124**(6): p. 929-934.
8. Waugh, J., et al., *Spot protein-creatinine ratio and spot albumin-creatinine ratio in the assessment of pre-eclampsia: a diagnostic accuracy study with decision-analytic model-based economic evaluation and acceptability analysis*. Health Technol Assess, 2017. **21**(61): p. 1-90.

9. Wastlund, D., et al., *The cost-effectiveness of universal late-pregnancy screening for macrosomia in nulliparous women: a decision-analysis*. BJOG, 2019.
10. National Institute for Health and Care Excellence, *Intrapartum Care for healthy women and babies. Clinical Guideline CG 190*. . 2014.
11. Schroeder, E., et al., *Cost effectiveness of alternative planned places of birth in woman at low risk of complications: evidence from the Birthplace in England national prospective cohort study*. BMJ, 2012. **344**: p. e2292.
12. Bick, D., et al., *A multicentre, randomised controlled trial of position during the late stages of labour in nulliparous women with an epidural: clinical effectiveness and an economic evaluation (BUMPES)*. Health Technol Assess, 2017. **21**(65): p. 1-176.
13. Mistry, H., et al., *A structured review and exploration of the healthcare costs associated with stillbirth and a subsequent pregnancy in England and Wales*. BMC Pregnancy Childbirth, 2013. **13**: p. 236.
14. Gallos, I., et al., *Uterotonic drugs to prevent postpartum haemorrhage: a network meta-analysis*. Health Technol Assess, 2019. **23**(9): p. 1-356.
15. Essex, H.N., et al., *Cost-Effectiveness of Nicotine Patches for Smoking Cessation in Pregnancy: A Placebo Randomized Controlled Trial (SNAP)*. Nicotine Tob Res, 2015. **17**(6): p. 636-42.
16. Ussher, M., et al., *The London Exercise And Pregnant smokers (LEAP) trial: a randomised controlled trial of physical activity for smoking cessation in pregnancy with an economic evaluation*. Health Technol Assess, 2015. **19**(84): p. vii-xxiv, 1-135.
17. Campbell, H.E., et al., *Healthcare and wider societal implications of stillbirth: a population-based cost-of-illness study*. BJOG, 2018. **125**(2): p. 108-117.
18. Jones, M., et al., *A dynamic, modifiable model for estimating cost-effectiveness of smoking cessation interventions in pregnancy: application to an RCT of self-help delivered by text message*. Addiction, 2019. **114**(2): p. 353-365.
19. Wastlund, D., et al., *Screening for breech presentation using universal late-pregnancy ultrasonography: A prospective cohort study and cost effectiveness analysis*. PLoS Med, 2019. **16**(4): p. e1002778.
20. Eddama, O., et al., *Study of progesterone for the prevention of preterm birth in twins (STOPPIT): findings from a trial-based cost-effectiveness analysis*. Int J Technol Assess Health Care, 2010. **26**(2): p. 141-8.
21. Jacklin, P.B., et al., *A cost-effectiveness comparison of the NICE 2015 and WHO 2013 diagnostic criteria for women with gestational diabetes with and without risk factors*. BMJ Open, 2017. **7**(8): p. e016621.
