# Supplementary material for: Costing the impact of interventions during pregnancy in the UK: a systematic review of economic evaluations
Source: HighWire-hosted journal article supplement (doi:10.1136/bmjopen-2020-040022), 2020-10-01
Supplement: bmjopen-2020-040022supp009_data_supplement.pdf [file bmjopen-2020-040022supp009_data_supplement.pdf]

Supplementary material 9 - Summary of UK Department of Health reference costs 2015-16 and 2018-19

| Activity costed                                                   | Department of Health Reference costs<br>2015-16 <sup>5</sup>                                                                           | Department of Health Reference costs<br>2018-19 <sup>4</sup>                                                                                                                                                 |
|-------------------------------------------------------------------|----------------------------------------------------------------------------------------------------------------------------------------|--------------------------------------------------------------------------------------------------------------------------------------------------------------------------------------------------------------|
| <b>Estimated cost for antenatal appointment</b>                   | Non-consultant-led outpatient attendance for obstetrics - £117.16<br><br>Consultant-led outpatient attendance for obstetrics - £141.95 | Tariff for all care within an average maternity pathway is costed as a composite, with higher prices paid for higher levels of obstetric complexity or presence of medical co-morbidities: £1,019-£2,713.00. |
| <b>Estimated cost for attendance to maternity day unit/triage</b> | £259.48 (NZ16Z - Day case)                                                                                                             |                                                                                                                                                                                                              |
| <b>Estimated cost for an antenatal inpatient admission</b>        | £1,133.76 for first day and £184.67 for every day after (NZ16Z - Antenatal Routine Observation)                                        |                                                                                                                                                                                                              |
| <b>Estimated cost for an ultrasound scan</b>                      | Sonography-led: £109.07 / scan (NZ21Z)<br>Specialist-led: £151.15 / scan (NZ22Z)                                                       |                                                                                                                                                                                                              |
| <b>Induction of labour</b>                                        | £537.90-£850.96 in addition to cost of normal vaginal delivery                                                                         | Upgrades the price for vaginal birth to a higher level of complexity.                                                                                                                                        |
| <b>Epidural</b>                                                   | £537.90-£850.96 in addition to cost of normal vaginal delivery                                                                         |                                                                                                                                                                                                              |
| <b>Spontaneous vaginal birth</b>                                  | £1,832.10-£2,259.20                                                                                                                    | £1,957-£3,357, depends on level of complexity and additional activity                                                                                                                                        |
| <b>Instrumental birth</b>                                         | £2,441.01-£3,204.83                                                                                                                    | £1,957-£3,357, depends on level of complexity and additional activity                                                                                                                                        |
| <b>Elective Caesarean section</b>                                 | £3,383.41-£5,042.31                                                                                                                    | £3,357                                                                                                                                                                                                       |
| <b>Emergency Caesarean section</b>                                | £4,594.77-£6,867.95                                                                                                                    |                                                                                                                                                                                                              |
| <b>Repair 3/4th degree tear</b>                                   | £242.06-£762.75 in addition to cost for normal vaginal birth                                                                           | £0.00 - £1,400.00 (upgrades vaginal birth price to £3,357, if not already being paid)                                                                                                                        |
| <b>Manual removal of placenta</b>                                 | £242.06-£762.75 in addition to cost for normal vaginal birth                                                                           | £0.00 - £1,400.00 (upgrades vaginal birth price to £3,357, if not already being paid)                                                                                                                        |

|                                                                  |                                                                                                                                                                       |                                                                                       |
|------------------------------------------------------------------|-----------------------------------------------------------------------------------------------------------------------------------------------------------------------|---------------------------------------------------------------------------------------|
| <b>Examination under anaesthesia for postpartum haemorrhage</b>  | £242.06-£762.75 in addition to cost for normal vaginal birth                                                                                                          | £0.00 - £1,400.00 (upgrades vaginal birth price to £3,357, if not already being paid) |
| <b>Maternal inpatient stay on postnatal ward / maternity HDU</b> | Immediate postnatal admission included in cost of birth until a pre-specified length of stay (varies according to mode of birth).<br>After this, £48.95-1,890.19/day. | Days after 6-9 days paid at £347.00 / day                                             |
| <b>Maternal inpatient stay in ITU</b>                            | £3,097.25 / day                                                                                                                                                       | To be negotiated locally                                                              |
